# Supplementary material
Source: publisher figshare collection journal article supplement (https://diabetesjournals.figshare.com/ndownloader/files/39522469)
Supplement: Supplementary file 1 [file 39522469]

## Sheet: Sheet1
Supplemental Table 2: Primer list for human qPCR analyses
Gene	Forward	Reverse
CHD4	GGAGCCTAAATCATCTGCTCAG	GTGAGGGTTCGATAATCCTCCT
G6PC2	GCAGGGCTTTATGGGCTATT	AGTTCATTTCCTCCAAGGTCAG
G6PD	GTAGGCAGCCTCTCTGCTATAA	TGGGCTGTTTGCGGATTTAA
GAPDH	GGAGCGAGATCCCTCCAAAAT	GGCTGTTGTCATACTTCTCATGG
HNF4A	CATGGCCAAGATTGACAACCT	TTCCCATATGTTCCTGCATCAG
INS	AGAGGCCATCAAGCAGATCACTGT	AGGTGTTGGTTCACAAAGGCTG
MAFA	TGAGCGGAGAACGGTGATTTCTAAGG	GGAACGGAGAACCACGTTCAACGTA
MAFB	ACCTTGGCTAAGGCGAGAGTAG	CTTCAGCCTGGAGAGAAGTTACTC
PDX1	AAGTCTACCAAAGCTCACGCG	GTAGGCGCCGCCTGC
SLC2A1	GGACAGGCTCAAAGAGGTTATG	AGGAGGTGGGTGGAGTTAAT
SLC2A2	CTAGGCAGAGCTGCGAATAAA	CTAGTTGGGAGTCCTGTCAATTC
